# Supplementary material for: A Pilot Study on the Relationship Between Thermal Habits, Chronic Inflammation, and Arterial Stiffness in Young Adults
Source: Research Square preprint supplement (doi:10.21203/rs.3.rs-5991274/v1), 2025-03-21
Supplement: Supplementary file 1 [file 6372c2dbf3eac9afbbf0628b.xlsx]

## Sheet: Table4a-c　suppl
	Table 4a. Overall Bivariate Relationships
		HSP70	hsCRP	IL-6	ABI	baPWV	Bathing Temperature	Bathing Duration	BMI
	HSP70		-0.09282	0.063352	-0.27987	-0.13665	-0.04713	-0.24136	-0.07769
	p-value		0.659	0.7635	0.1754	0.5148	0.8527	0.3507	0.712
	hsCRP			-0.2763	0.138081	-0.01931	-0.24566	-0.03802	0.31762
	p-value			0.1812	0.5104	0.927	0.3258	0.8848	0.1218
	IL-6 (pg/ml)				-0.24641	-0.01403	0.306551	-0.41229	-0.37213
	p-value				0.2351	0.9469	0.216	0.1*	0.067*
	ABI					-0.06363	-0.2638	0.12934	0.014395
	p-value					0.7625	0.2902	0.6208	0.9456
	baPWV						-0.29642	0.50552	0.005534
	p-value						0.2323	0.038**	0.9791
	Bathing Temperature							-0.05375	0.625764
	p-value							0.8377	0.001**
	Bathing Duration								0.258859
	p-value								0.3157
	The relationship between the two continuous variables was evaluated using Spearman's rank correlation coefficient. ** p < 0.05; * p < 0.1.
	Table 4b. Male-Specific Bivariate Relationships
		HSP70	hsCRP	IL-6	ABI	baPWV	Bathing Temperature	Bathing Duration	BMI
	HSP70		-0.05	0.0848	-0.795	0.2167	0.9747	-	0.2698
	p-value		0.8984	0.8284	0.01**	0.5755	0.00**	-	0.4826
	hsCRP			0.1526	0.2259	-0.0333	-0.3591	-	0.2872
	p-value			0.6952	0.5588	0.9322	0.5528	-	0.4536
	IL-6				0.1192	-0.1695	0.1316	-	-0.0177
	p-value				0.7601	0.6628	0.833	-	0.9639
	ABI					-0.2343	-0.3591	-	-0.0656
	p-value					0.544	0.5528	-	0.8669
	baPWV						-0.3591	-	-0.6006
	p-value						0.5528	-	0.0872
	Bathing Temperature							-	0.7255
	p-value							-	0.1654
	Bathing Duration								-
	p-value								-
	The relationship between the two continuous variables was evaluated usingSpearman's rank correlation coefficient.However, for some variables, the correlation could not be computed due to the small sample size, and these values are indicated as '-' in the table. ** p < 0.05; * p < 0.1.
	Table 4c. Female-Specific Bivariate Relationships
		HSP70	hsCRP	IL-6	ABI	baPWV	Bathing Temperature	Bathing Duration	BMI
	HSP70		-0.2412	0.0235	-0.0177	-0.1765	-0.3132	0.2184	-0.3728
	p-value		0.36	0.93	0.95	0.5133	0.2974	0.4735	0.155
	hsCRP			-0.4118	0.3483	0.1441	-0.1129	-0.2854	0.645
	p-value			0.11	0.19	0.5944	0.7135	0.3446	0.007**
	IL-6				-0.5432	-0.0441	0.3725	-0.166	-0.1805
	p-value				0.03**	0.8711	0.2101	0.5879	0.5036
	ABI					0.2819	-0.2773	-0.0292	0.0594
	p-value					0.2901	0.359	0.9246	0.08271
	baPWV						-0.5616	-0.3232	-0.361
	p-value						0.0458**	0.2814	0.1696
	Bathing Temperature							-0.1271	0.5279
	p-value							0.679	0.0637
	Bathing Duration								-0.0707
	p-value								0.8186
	The relationship between the two continuous variables was evaluated usingSpearman's rank correlation coefficient. ** p < 0.05; * p < 0.1.
