# Supplementary material for: A Pilot Study on the Relationship Between Thermal Habits, Chronic Inflammation, and Arterial Stiffness in Young Adults
Source: Research Square preprint supplement (doi:10.21203/rs.3.rs-5991274/v1), 2025-03-21
Supplement: Supplementary file 2 [file 7380ad84950d2fad7a4e3c28.xlsx]

## Sheet: Table 1
	Table.1 Baseline characteristics
		Female (average±SD）	Male
	N	16	9
	Age (years)	21.0±0.97	21.78±2.05
	Height (cm)	159.48±6.12	169.11±4.26
	Body Mass (kg)	52.474±8.3	65.67±6.86
	BMI (kg/m²)	20.11±2.68	22.92±1.94

## Sheet: Table2
		Table 2. Association Between Hot Tub Bathing Habits and Chronic Inflammation-Related Proteins and Arterial Stiffness
				Overall （N＝25)		Males（N＝9)		Females（N＝16）
		Variable	Bathing Habits Growp		p-value	Median (IQR)	p-value	Median (IQR)	p-value
		IL-6 (pg/ml)	Habit	30.98 (29.81-34.73)	0.04**	30.06 (30.06--30.81)	0.38	32.06 (29.79-34.85)	0.018**
			No habit	34.31 (32.83-42.33)		32.35 (31.06-33.66)		45.52 (37.83-55.69)
		hsCRP (ng/ml)	Habit	1.19 (0.56-2.06)	0.15	1.19 (1.00-1.36)	0.54	1.23 (0.44-2.11)	0.08*
			No habit	0.58 (0.35-+1.00)		0.89 (0.63-1.63)		0.35 (0.33-0.51)
		HSP70 (μg/ml)	Habit	4.60 (4.28-5.15)	0.22	4.58 (4.28-4.6)	0.27	4.84 (4.36-5.76)	0.5
			No habit	1.19 (4.50-10.97)		6.83 (4.5-11.85)		6.06 (5.10-8.88)
		baPWV (cm/s)	Habit	1000.0 (932.25-1095.5)	0.15	1163.5 (1095.5-1169.5)	0.54	947.0 (925.31-1017.44)	0.67
			No habit	1142.75 (1016.31-1199.25)		1179.38 (1109.5-1245.19)		1039.38 (913.5-1163.81)
		The group with a habit of immersion bathing showed significantly lower plasma IL-6 levels in the overall analysis (p=0.04) and in females (p=0.018). On the other hand, no significant differences were observed in plasma hsCRP, HSP70 concentrations, or baPWV between the two groups. Comparison of the means was analyzed using the Mann-Whitney U test. ** p < 0.05, *p<0.1

## Sheet: Table3
	Table 3. Significant Bivariate Relationships Between Chronic Inflammation-Related Proteins, Arteriosclerosis, and Bathing-Related Factors in Overall, Male, and Female Participants
	Variable Pair	Overall (ρ, p-value)	Male (ρ, p-value)	Female (ρ, p-value)
	HSP70 vs ABI	-0.2799, p=0.18	-0.7950, p=0.01**	-0.0177, p=0.95
	HSP70 vs Bathing Temperature	-0.0471, p=0.85	0.9747, p=0.00**	-0.3132, p=0.30
	IL-6 vs ABI	-0.2464, p=0.24	0.1192, p=0.76	-0.5432, p=0.03**
	baPWV vs Bathing Duration	0.5055, p=0.038**	-	-0.3232, p=0.28
	baPWV vs Bathing Temperature	-0.2964, p=0.23	-0.3591, p=0.55	-0.5616, p=0.045**
	IL-6 vs Bathing Duration	-0.41229, p=0.1*	-	-0.166, p=0.5879
	The relationship between the two continuous variables was evaluated using Spearman's rank correlation coefficient. ** p < 0.05; * p < 0.1.
